# Supplementary material for: Non-Targeted Metabolomics Analysis of the Effects of Tyrosine Kinase Inhibitors Sunitinib and Erlotinib on Heart, Muscle, Liver and Serum Metabolism In Vivo
Source: MDPI journal article supplement (doi:10.3390/metabo7030031), 2017-06-22
Supplement: s1 [file s1]

# Supplementary Materials: Non-Targeted Metabolomics Analysis of the Effects of Tyrosine Kinase Inhibitors Sunitinib and Erlotinib on Heart, Muscle, Liver and Serum Metabolism *In Vivo*

Brian C. Jensen <sup>1,\*</sup>, Traci L. Parry, Wei Huang, Amro Ilaiwy, James R. Bain, Michael J. Muehlbauer, Sara K. O'Neal, Cam Patterson, Gary L. Johnson, Monte S. Willis

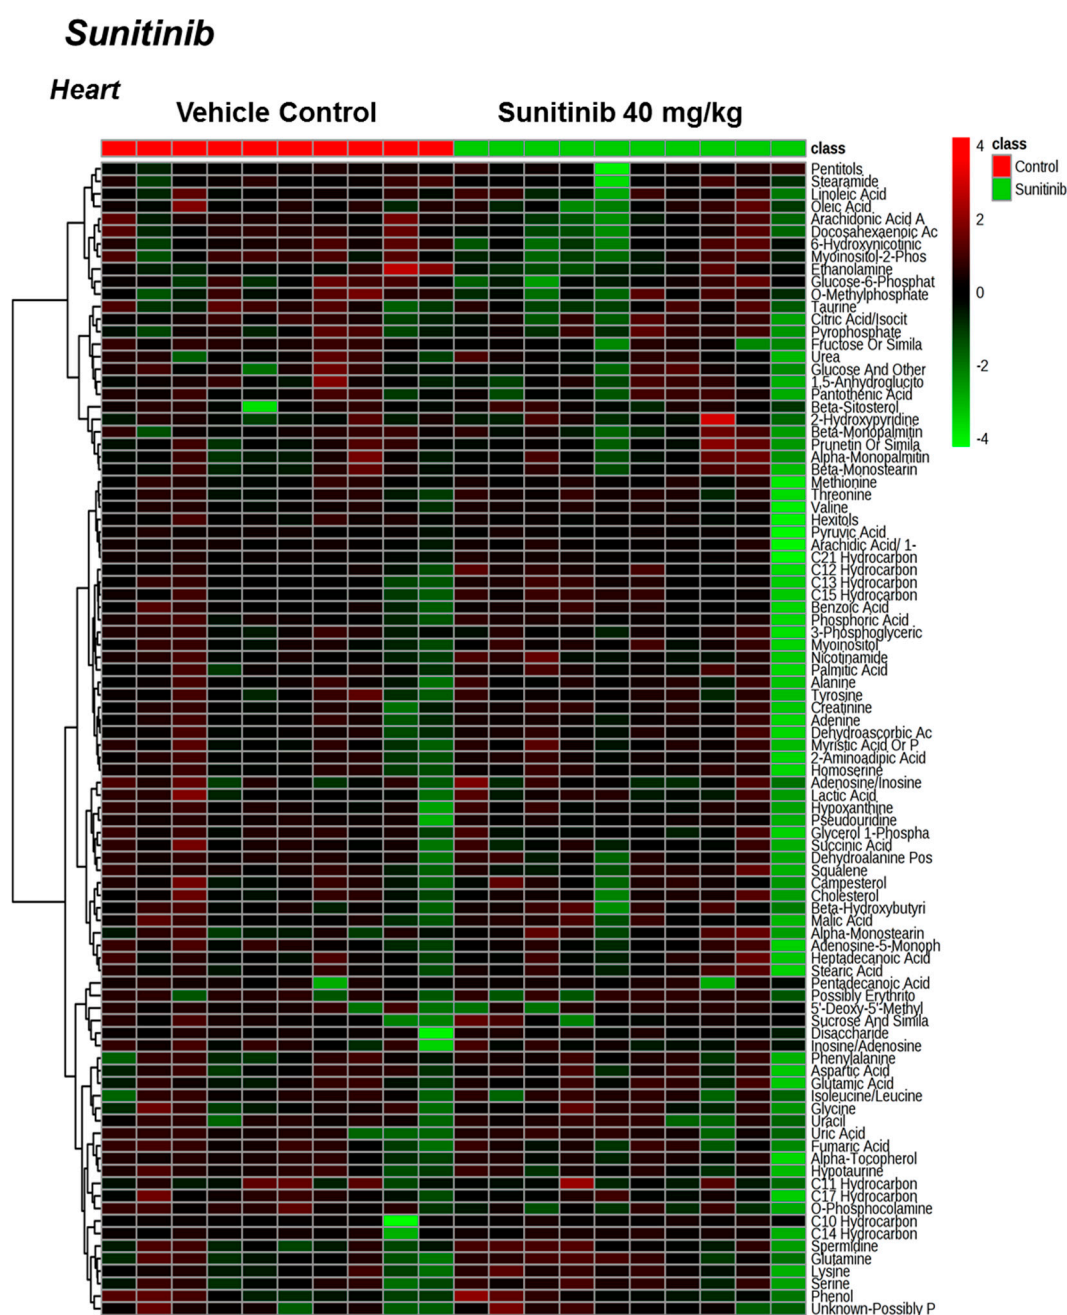

**Figure S1.** Heat map of all cardiac metabolites identified by GC-MS in sunitinib-treated animals.

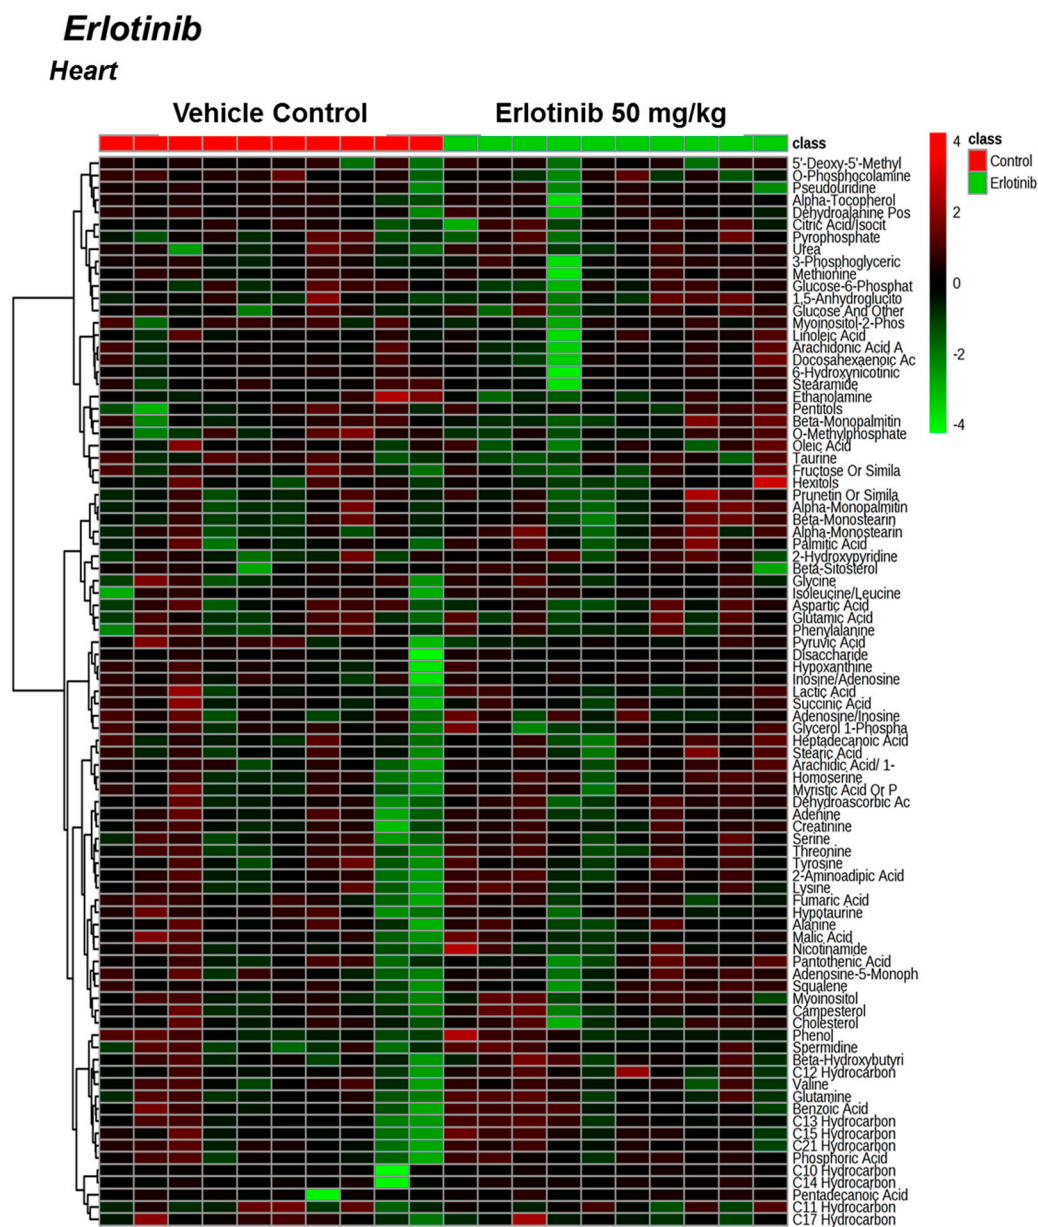

**Figure S2.** Heat map of all cardiac metabolites identified by GC-MS in erlotinib-treated animals.

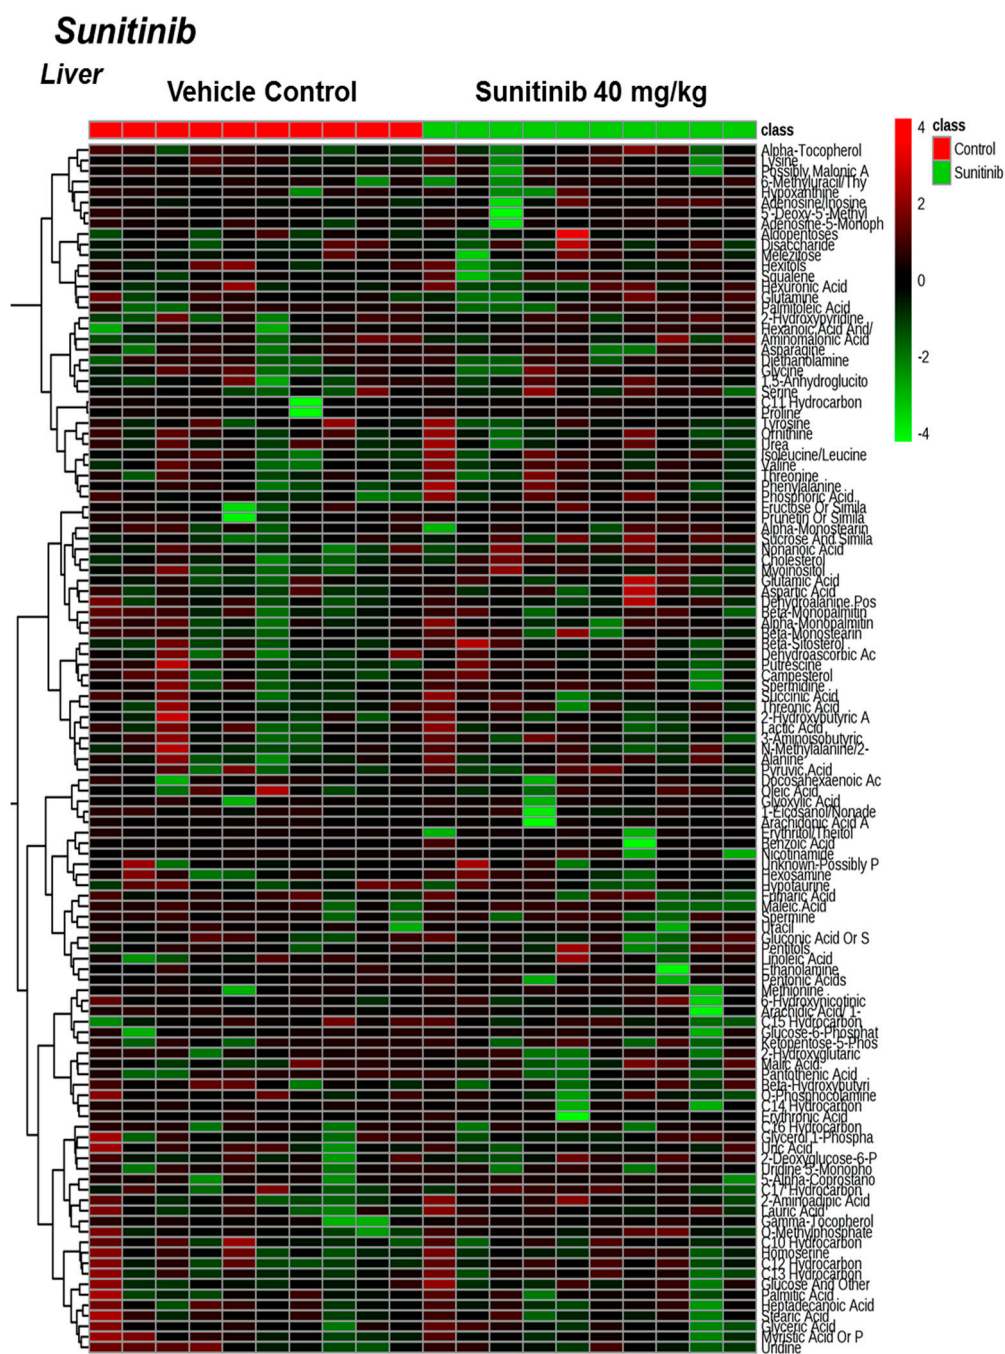

**Figure S3.** Heat map of all liver metabolites identified by GC-MS in sunitinib-treated animals.

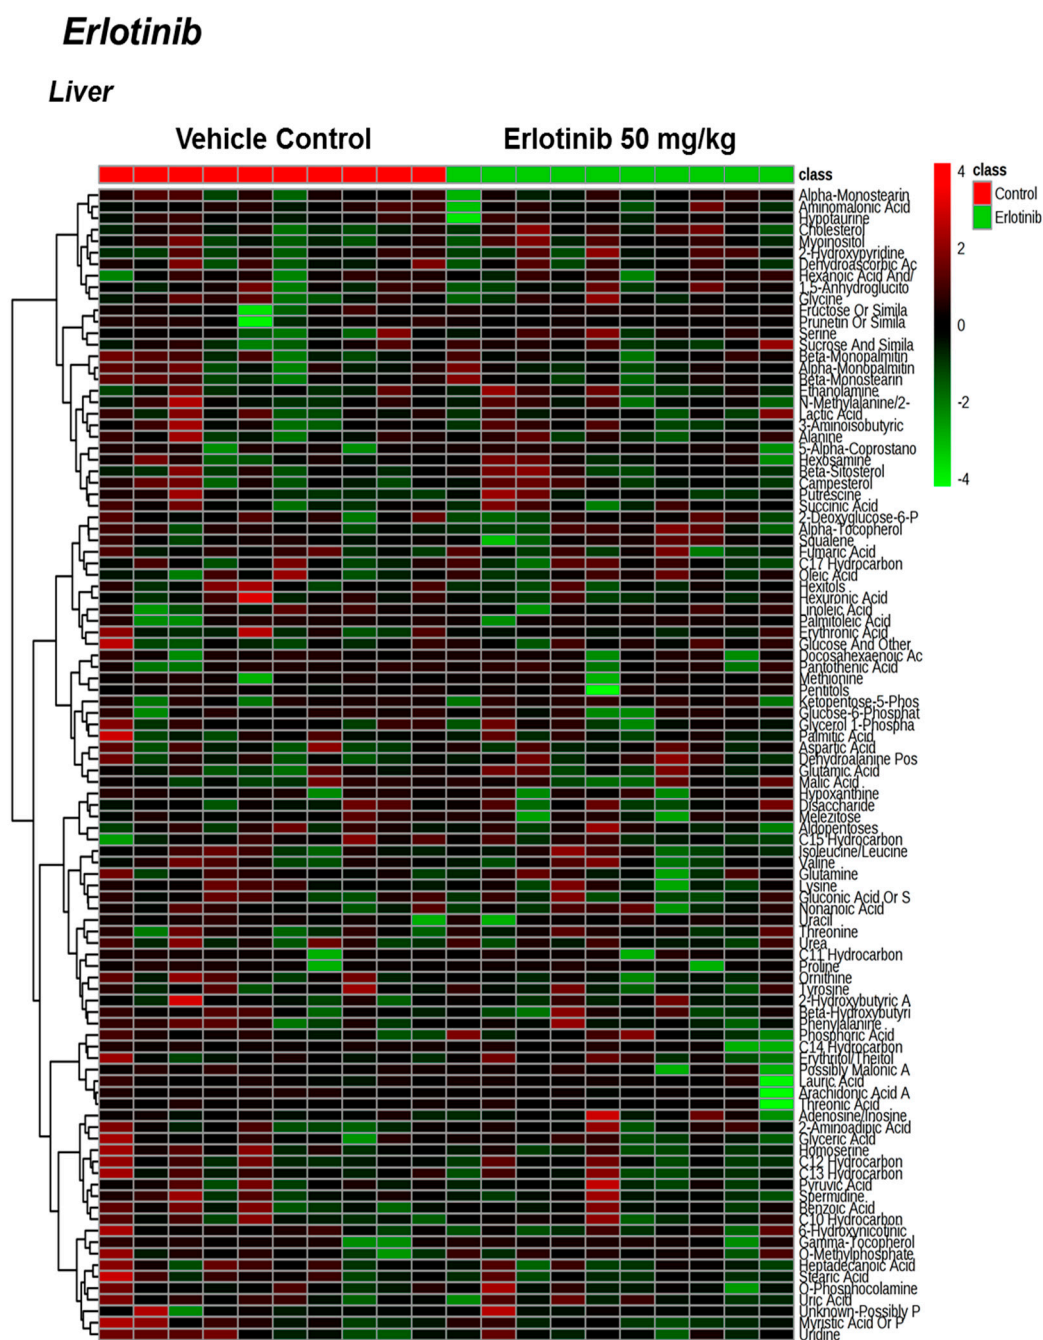

**Figure S4.** Heat map of all liver metabolites identified by GC-MS in erlotinib-treated animals.



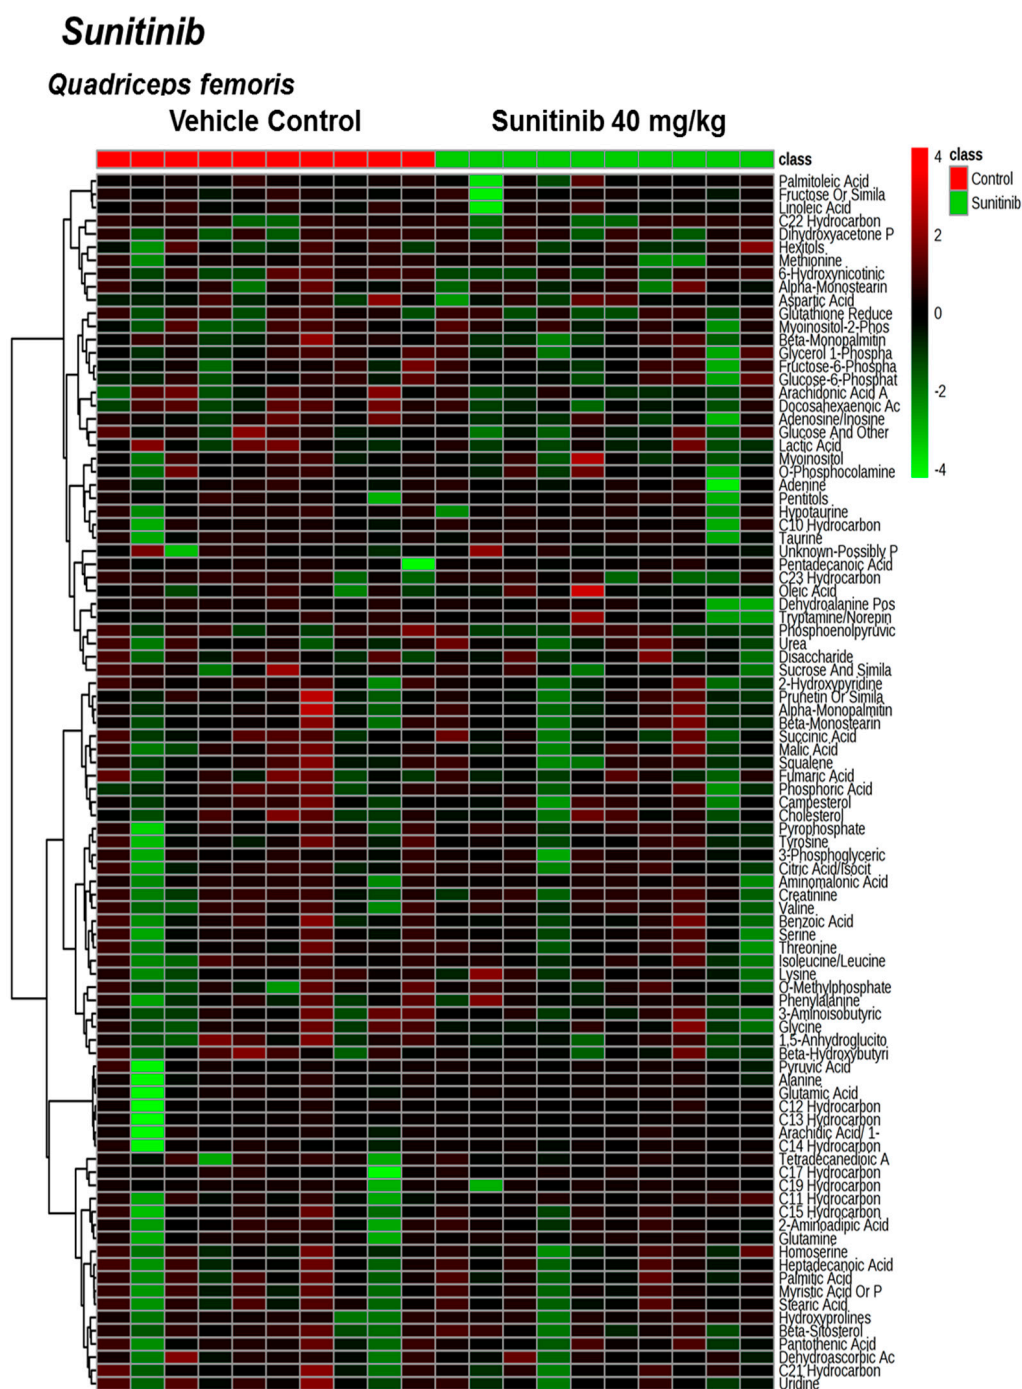

**Figure S5.** Heat map of all quadriceps femoris metabolites identified by GC-MS in sunitinib-treated animals.

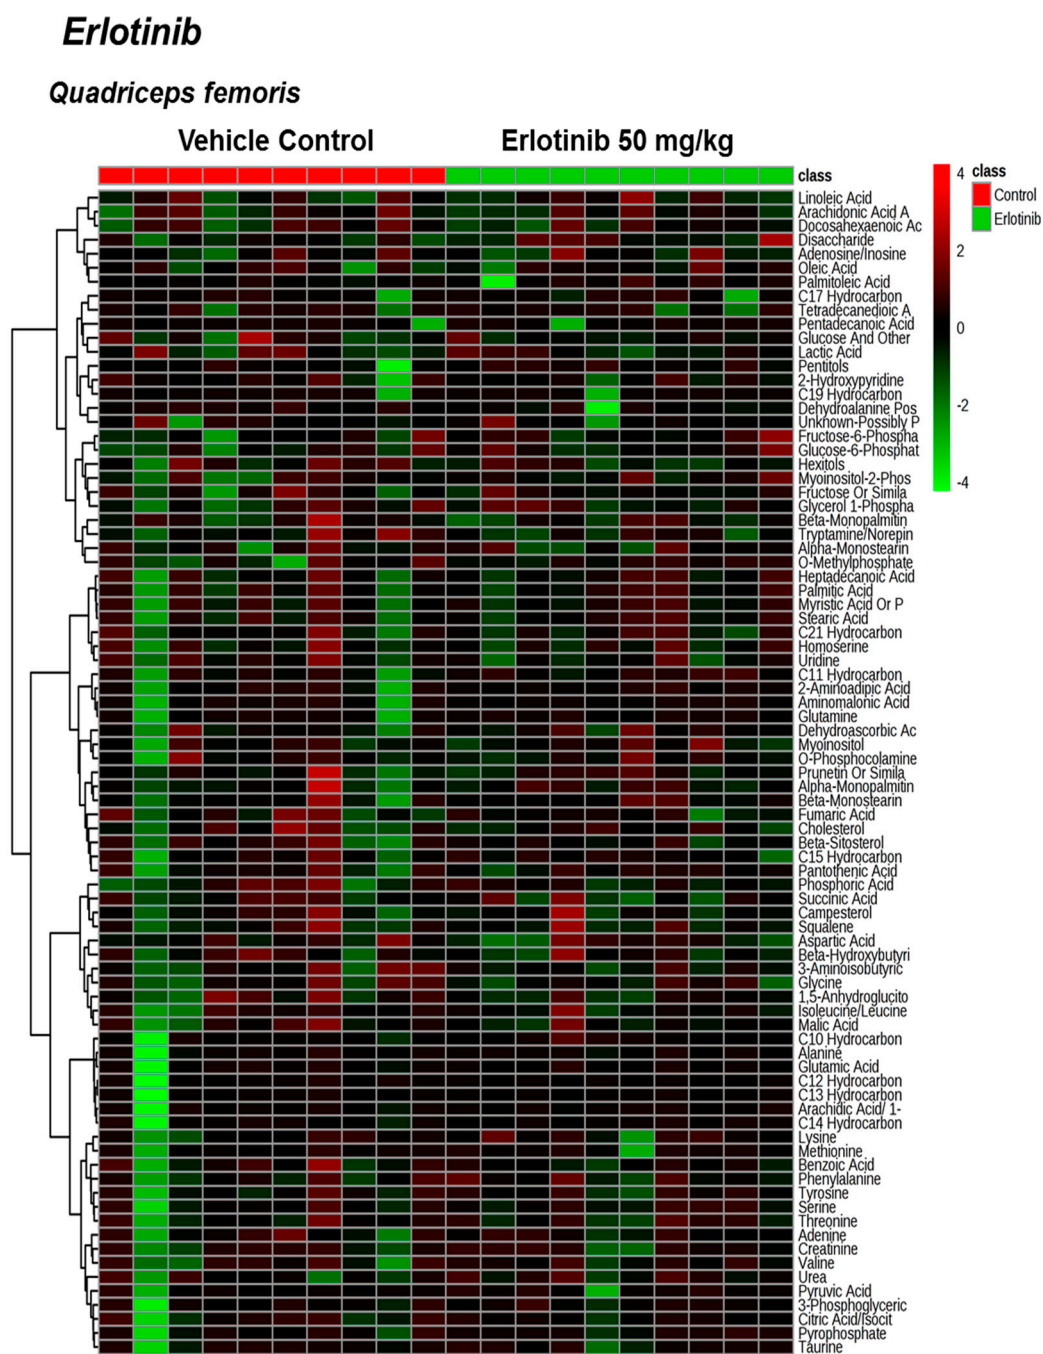

**Figure S6.** Heat map of all quadriceps femoris metabolites identified by GC-MS in erlotinib-treated animals.
